# Supplementary material for: Snakebite: An Exploratory Cost-Effectiveness Analysis of Adjunct Treatment Strategies
Source: PubMed Central journal article supplement (PMC6090346; doi:10.4269/ajtmh.17-0922), 2018-06-04
Supplement: tpmd170922.SD3.pdf [file tpmd170922.SD3.pdf]

SUPPLEMENTAL APPENDIX 1

Cost tables: items, unit costs, and totals for all model costs

SUPPLEMENTAL APPENDIX 2

Full decision tree, including costs and disability-adjusted life years associated with each arm
